# Supplementary material for: Random sequences rapidly evolve into de novo promoters
Source: PubMed Central journal article supplement (PMC5906472; doi:10.1038/s41467-018-04026-w), 2018-04-18
Supplement: 41467_2018_4026_MOESM3_ESM.pdf [file 41467_2018_4026_MOESM3_ESM.pdf]

## **Description of Additional Supplementary File**

File Name: Supplementary Data 1

Description: A list of all mutations found in the different replicates of each of the 40 evolving random sequences
